# Supplementary material for: Efficient hydrogenolysis of 5-hydroxymethylfurfural to 2,5-dimethylfuran over a cobalt and copper bimetallic catalyst on N-graphene-modified Al2O3
Source: Royal Society of Chemistry journal article supplement (doi:10.1039/c6gc02630c), 2016-01-01
Supplement: c6gc02630c1.pdf [file c6gc02630c1.pdf]

**Efficient Hydrogenolysis of 5-Hydroxymethylfurfural to 2,5-Dimethylfuran over Cobalt and Copper Bimetallic Catalyst on N-Graphene-Modified  $\text{Al}_2\text{O}_3$**

Weiwei Guo, Hangyu Liu, Suqi Zhang, Hongling Han, Huizhen Liu\*, Tao Jiang\*, Buxing Han, Tianbin Wu

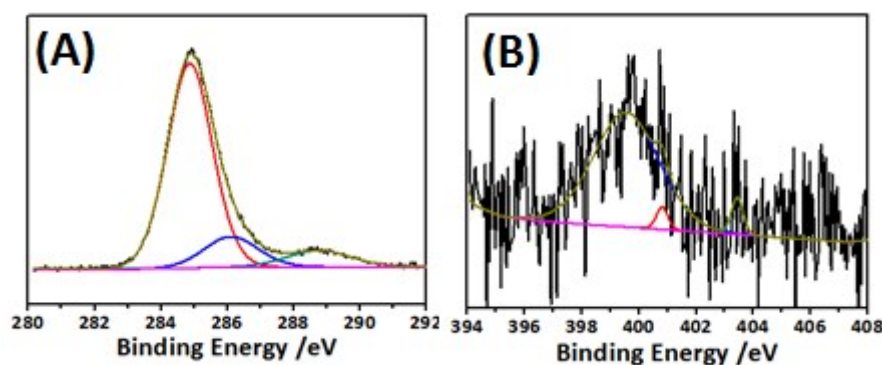

Figure S1 XPS spectrum of NGr/ $\alpha$ - $\text{Al}_2\text{O}_3$ : (A) C 1s XPS spectra, (B) N 1s XPS spectra

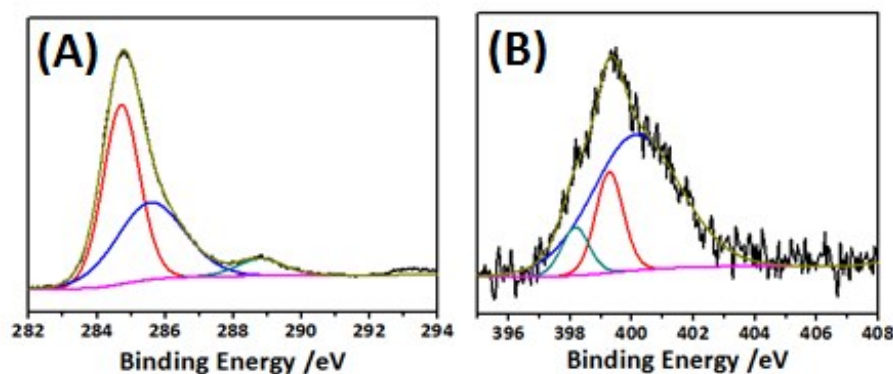

Figure S2 XPS spectrum of Cu/NGr/ $\alpha$ - $\text{Al}_2\text{O}_3$ : (A) C 1s XPS spectra, (B) N 1s XPS spectra

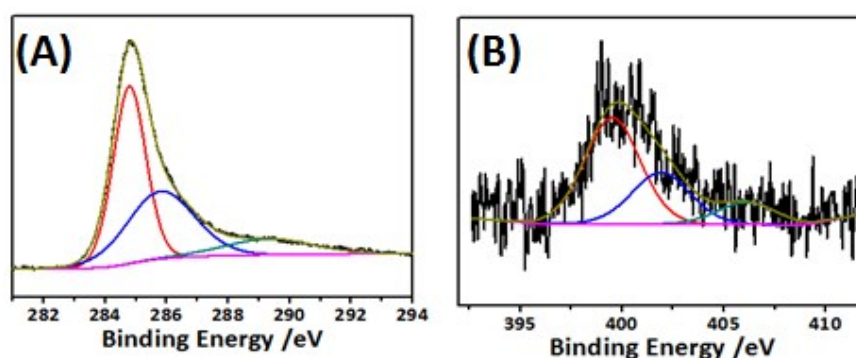

Figure S3 XPS spectrum of Cu<sup>®</sup>/NGr/ $\alpha$ -Al<sub>2</sub>O<sub>3</sub>: (A) C 1s XPS spectra, (B) N 1s XPS spectra

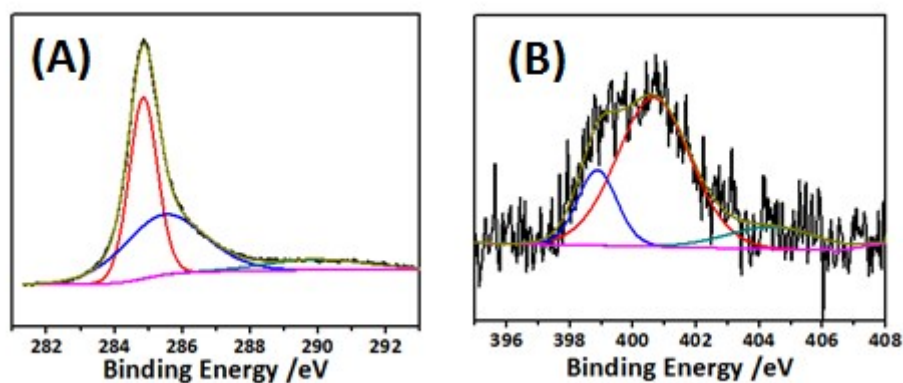

Figure S4 XPS spectrum of Co/NGr/ $\alpha$ -Al<sub>2</sub>O<sub>3</sub>: (A) C 1s XPS spectra, (B) N 1s XPS spectra

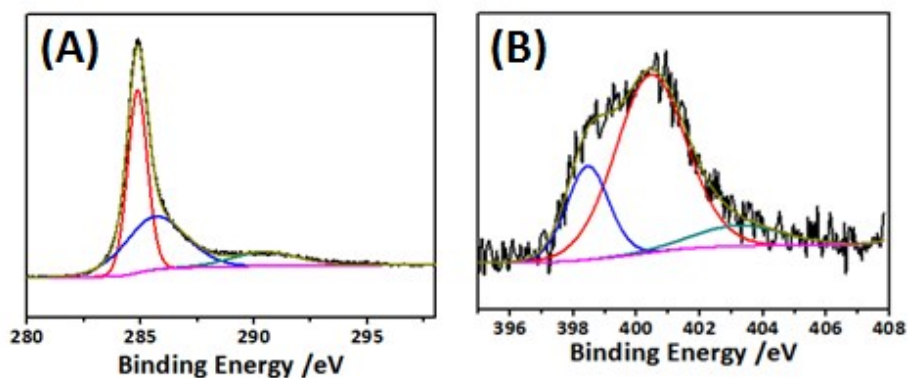

Figure S5 XPS spectrum of Co<sup>®</sup>/NGr/ $\alpha$ -Al<sub>2</sub>O<sub>3</sub>: (A) C 1s XPS spectra, (B) N 1s XPS spectra

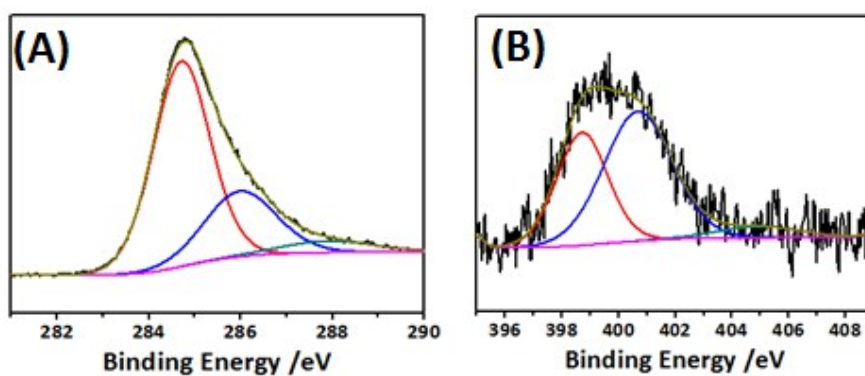

Figure S6 XPS spectrum of CuCo<sup>®</sup>/NGr/ $\alpha$ -Al<sub>2</sub>O<sub>3</sub> after being reused one time: (A) C 1s XPS spectra, (B) N 1s XPS spectra
